# Supplementary material
Source: Springer Nature journal article supplement (https://www.springermedizin.de/resource/supplementary/12889_2010_2008_MOESM1_ESM.pdf/9487310)
Supplement: MOESM1 [file 9487310]

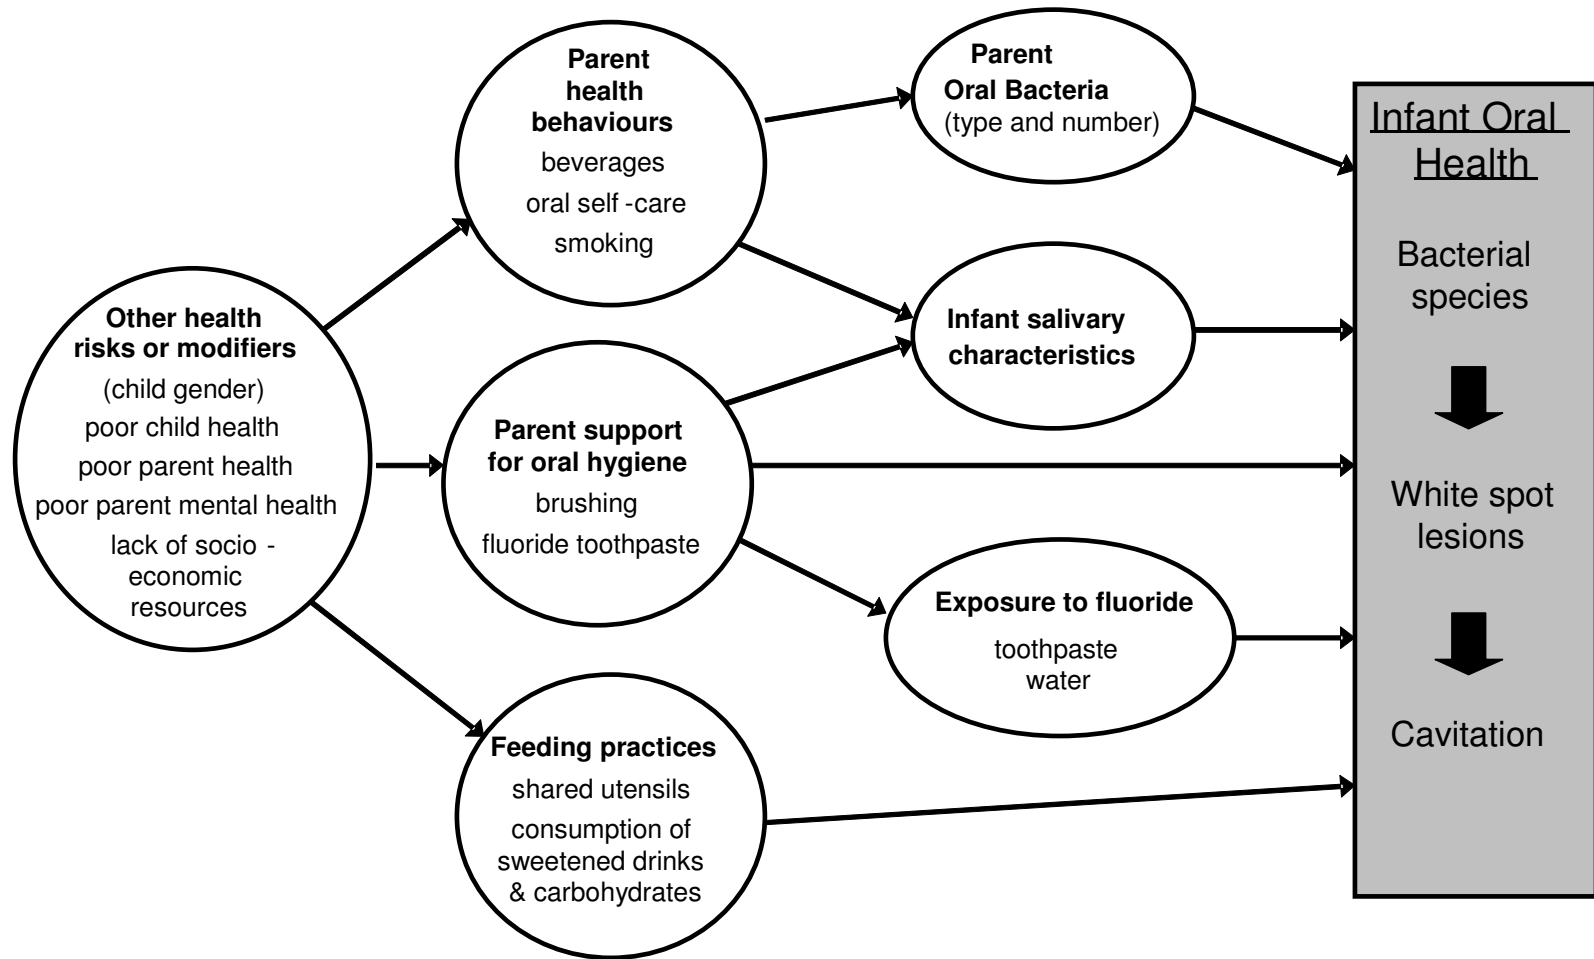

Distal parent & socio-ecological factors (survey)

Proximal parent & socio-ecological factors (survey)

Biological & exposure factors (clinical & survey)
